# Supplementary material for: Systems-Based Analyses of Brain Regions Functionally Impacted in Parkinson's Disease Reveals Underlying Causal Mechanisms
Source: PubMed Central journal article supplement (PMC4149353; doi:10.1371/journal.pone.0102909), 2014-08-29
Supplement: pone.0102909.s010.pdf [file pone.0102909.s010.pdf]

**Supplementary Table S10: Panomics Gene Probe IDs**

| Gene    | Accession | Gene     | Accession | Gene     | Accession    |
|---------|-----------|----------|-----------|----------|--------------|
| ACTR3   | NM_005721 | HBEGF    | NM_001945 | PENK     | NM_001135690 |
| ADORA2A | NM_000675 | HLA-DRB5 | NM_002125 | PIK3R2   | NM_005027    |
| AHSA2   | NM_152392 | HPRT1    | NM_000194 | PLAT     | NM_000930    |
| ALDH1A1 | NM_000689 | IGF2     | NM_000612 | PPIB     | NM_000942    |
| CAMK2B  | NM_001220 | IL1B     | NM_000576 | PRKCZ    | NM_002744    |
| CCL3    | NM_002983 | IL8      | NM_000584 | RAB3C    | NM_138453    |
| CXCR4   | NM_003467 | INS      | NM_000207 | RELN     | NM_005045    |
| DDIT4   | NM_019058 | INSR     | NM_000208 | RIMS1    | NM_014989    |
| DDX3Y   | NM_004660 | MAG      | NM_002361 | RPLP0    | NM_001002    |
| EDN1    | NM_001955 | MT1G     | NM_005950 | SELE     | NM_000450    |
| FABP7   | NM_001446 | MYH16    | NR_002147 | SLC17A8  | NM_139319    |
| FOS     | NM_005252 | MYRIP    | NM_015460 | SLCO1A2  | NM_134431    |
| FZD1    | NM_003505 | NFKBIA   | NM_020529 | SLCO4A1  | NM_016354    |
| FZD6    | NM_003506 | NLGN4Y   | NM_014893 | SNAP25   | NM_003081    |
| GABRA4  | NM_000809 | NQO1     | NM_000903 | TH       | NM_199292    |
| GAPDH   | NM_002046 | OLIG2    | NM_005806 | TNFRSF1A | NM_001065    |
| GRIA1   | NM_000827 | OPALIN   | NM_033207 | USP9Y    | NM_004654    |
| GUSB    | NM_000181 | P2RX7    | NM_002562 | VAMP2    | NM_014232    |
| HBB     | NM_000518 | PCDH8    | NM_002590 | VCAM1    | NM_001078    |
